# Supplementary material for: Zeolitic imidazolate framework-8/bacterial cellulose composites for iodine loading and their antibacterial performance
Source: Royal Society of Chemistry journal article supplement (doi:10.1039/d2dt01414a), 2022-01-01
Supplement: d2dt01414a1.pdf [file d2dt01414a1.pdf]

## Zeolitic imidazolate framework-8/Bacterial Cellulose Composite for Iodine Loading and Its Antibacterial Performance

Liping Du, Tianzi Zhang, Pingmengxia Li, Wei Chen\*, Chunsheng Wu\*

Institute of Medical Engineering, Department of Biophysics, School of Basic Medical Sciences, Health Science Center, Xi'an Jiaotong University, Xi'an 710061, China

\*weiwccchen@xjtu.edu.cn; wuchunsheng@xjtu.edu.cn; Fax: +86-29-82657763; Tel: +86-29-82657763

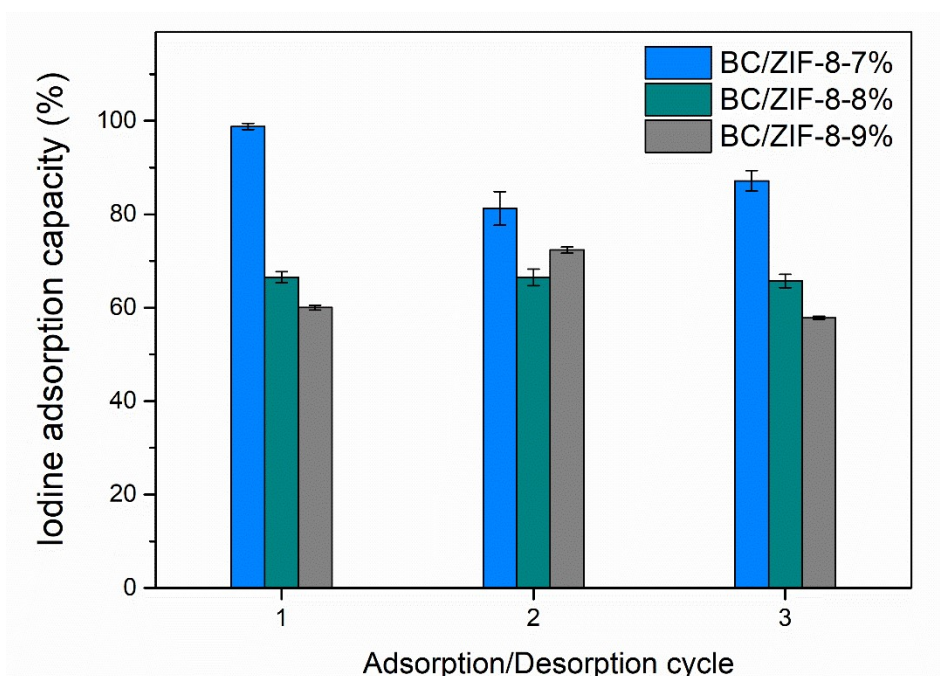

Fig. S1 A recyclability test of BC/ZIF-8 composite
